# Supplementary figures and images for: Wing shape allometry and aerodynamics in calopterygid damselflies: a comparative approach
Source: Springer Nature journal article supplement (doi:10.1186/1471-2148-13-118), 2013-01-01

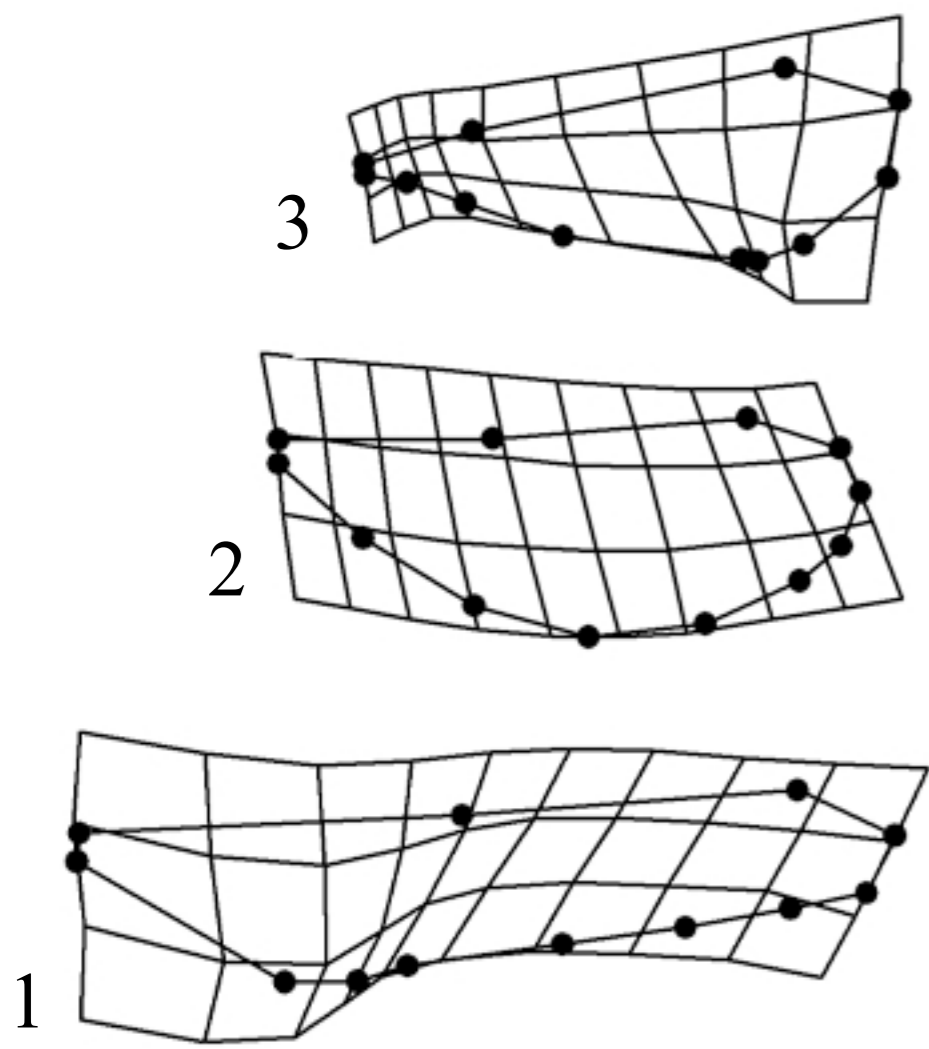

A

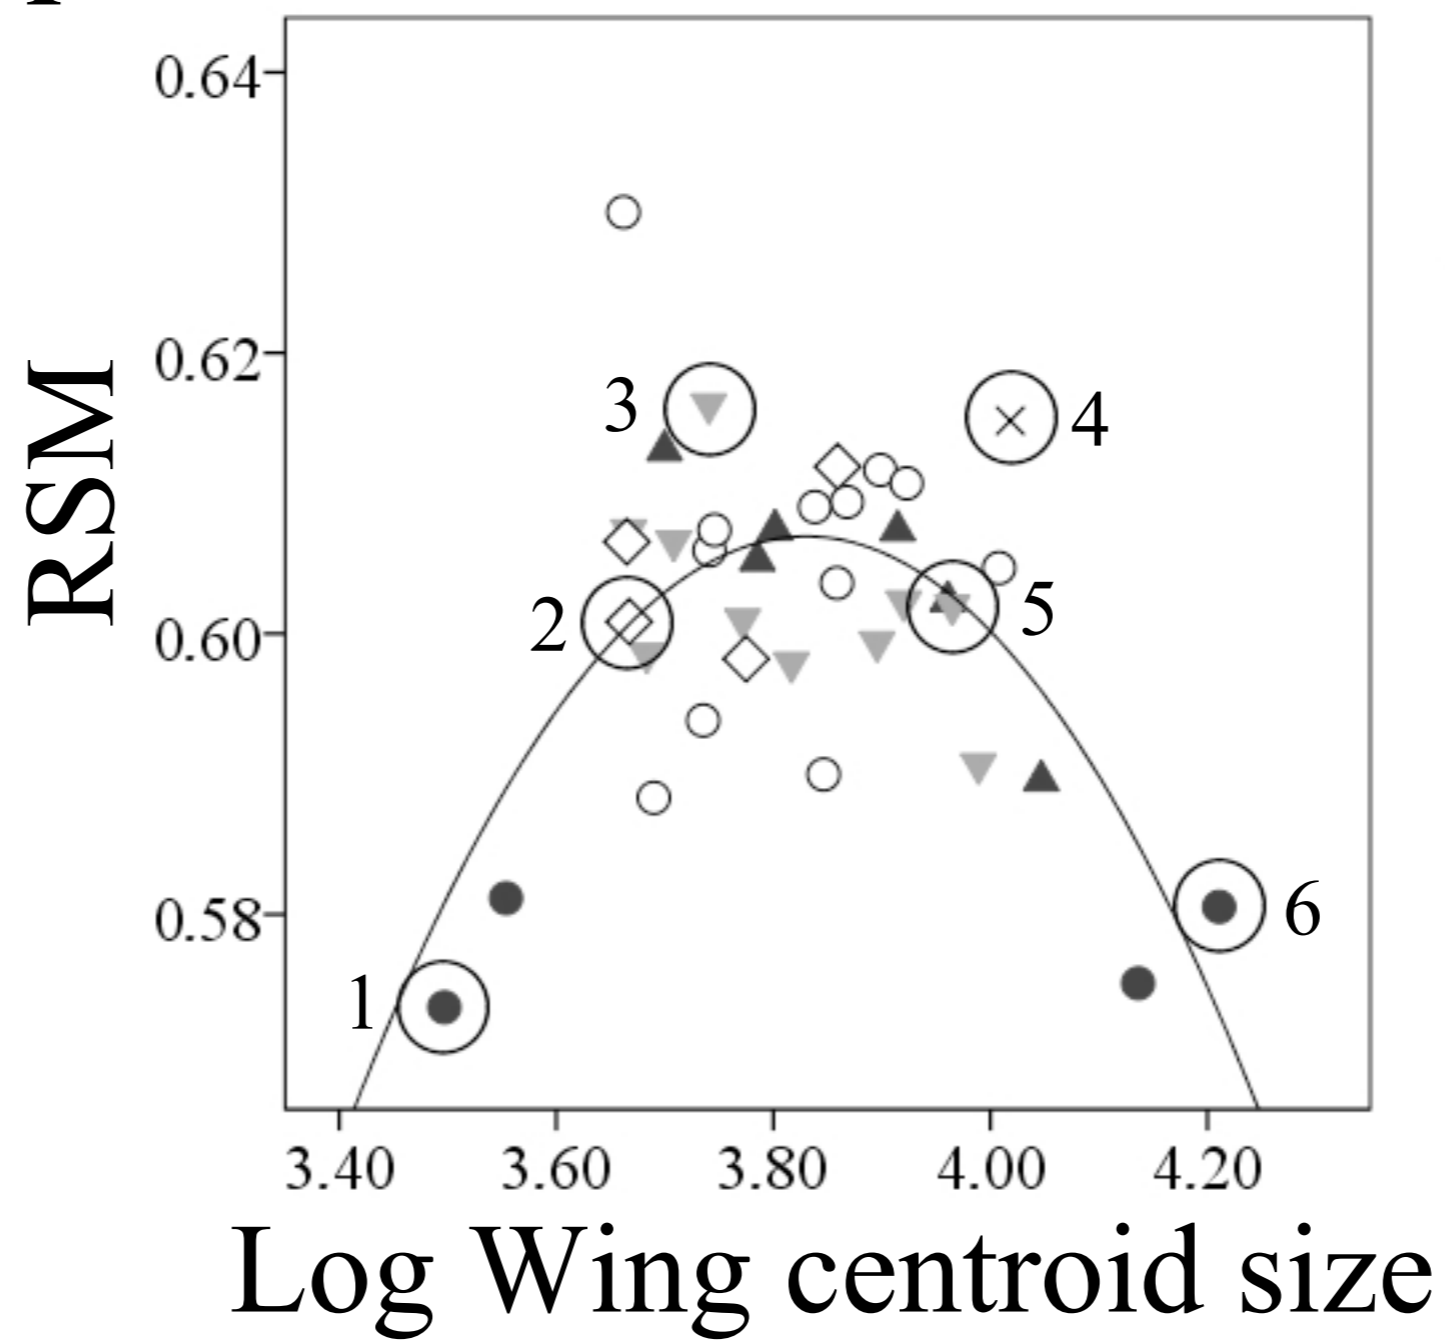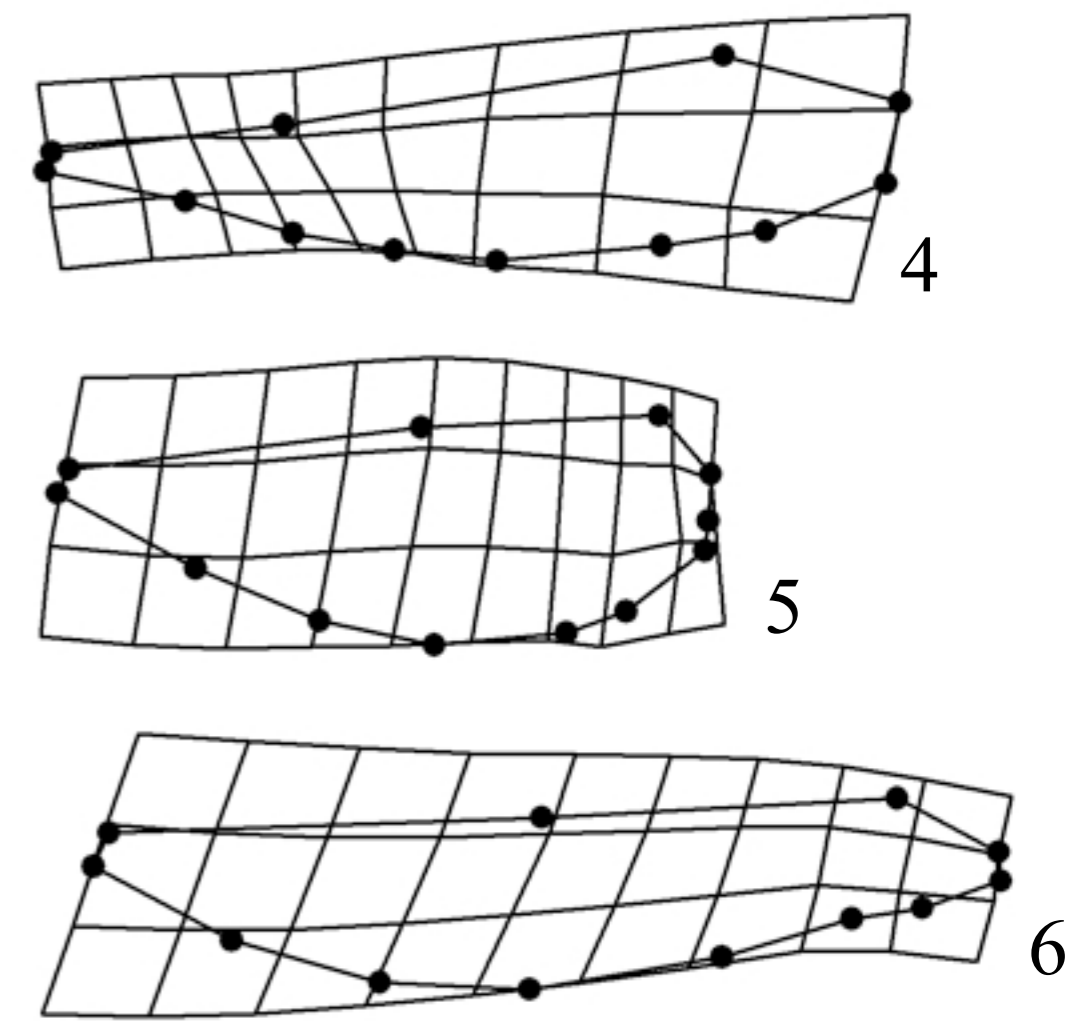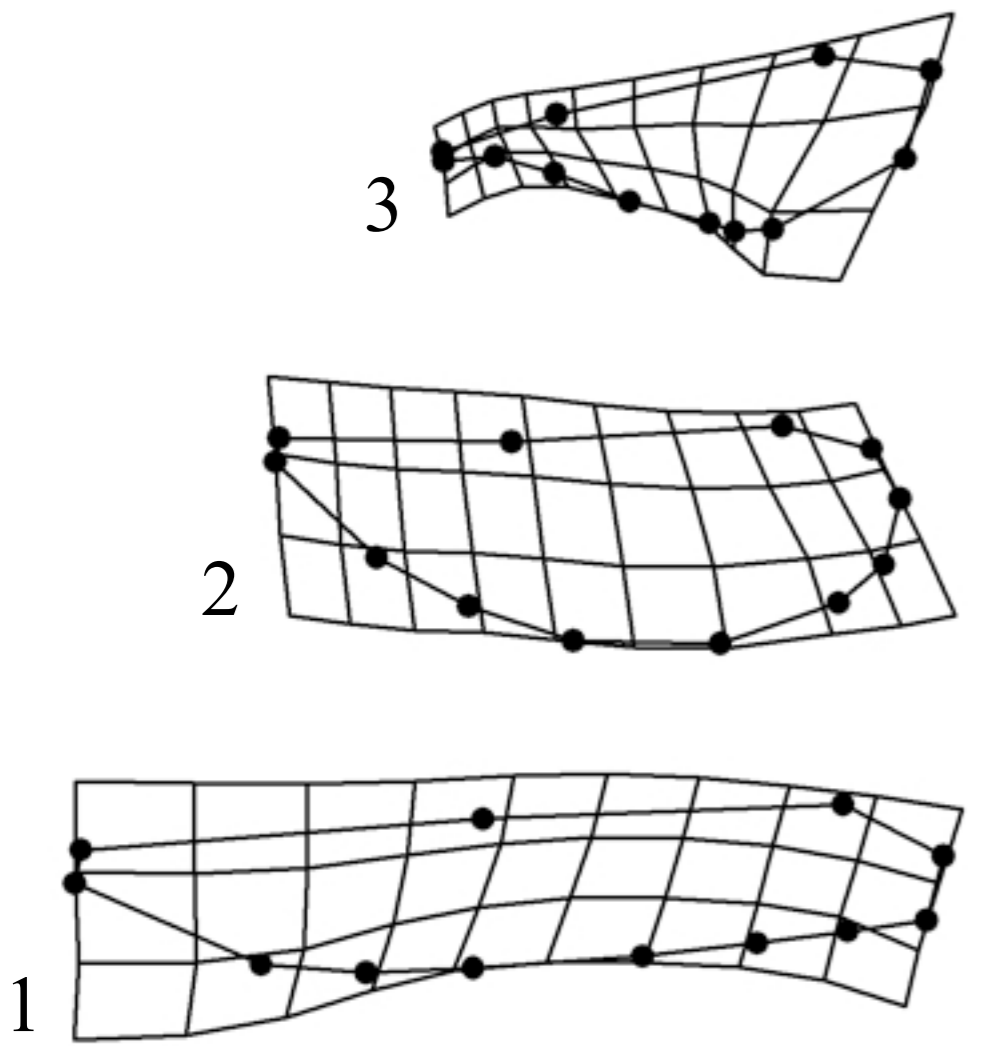

B

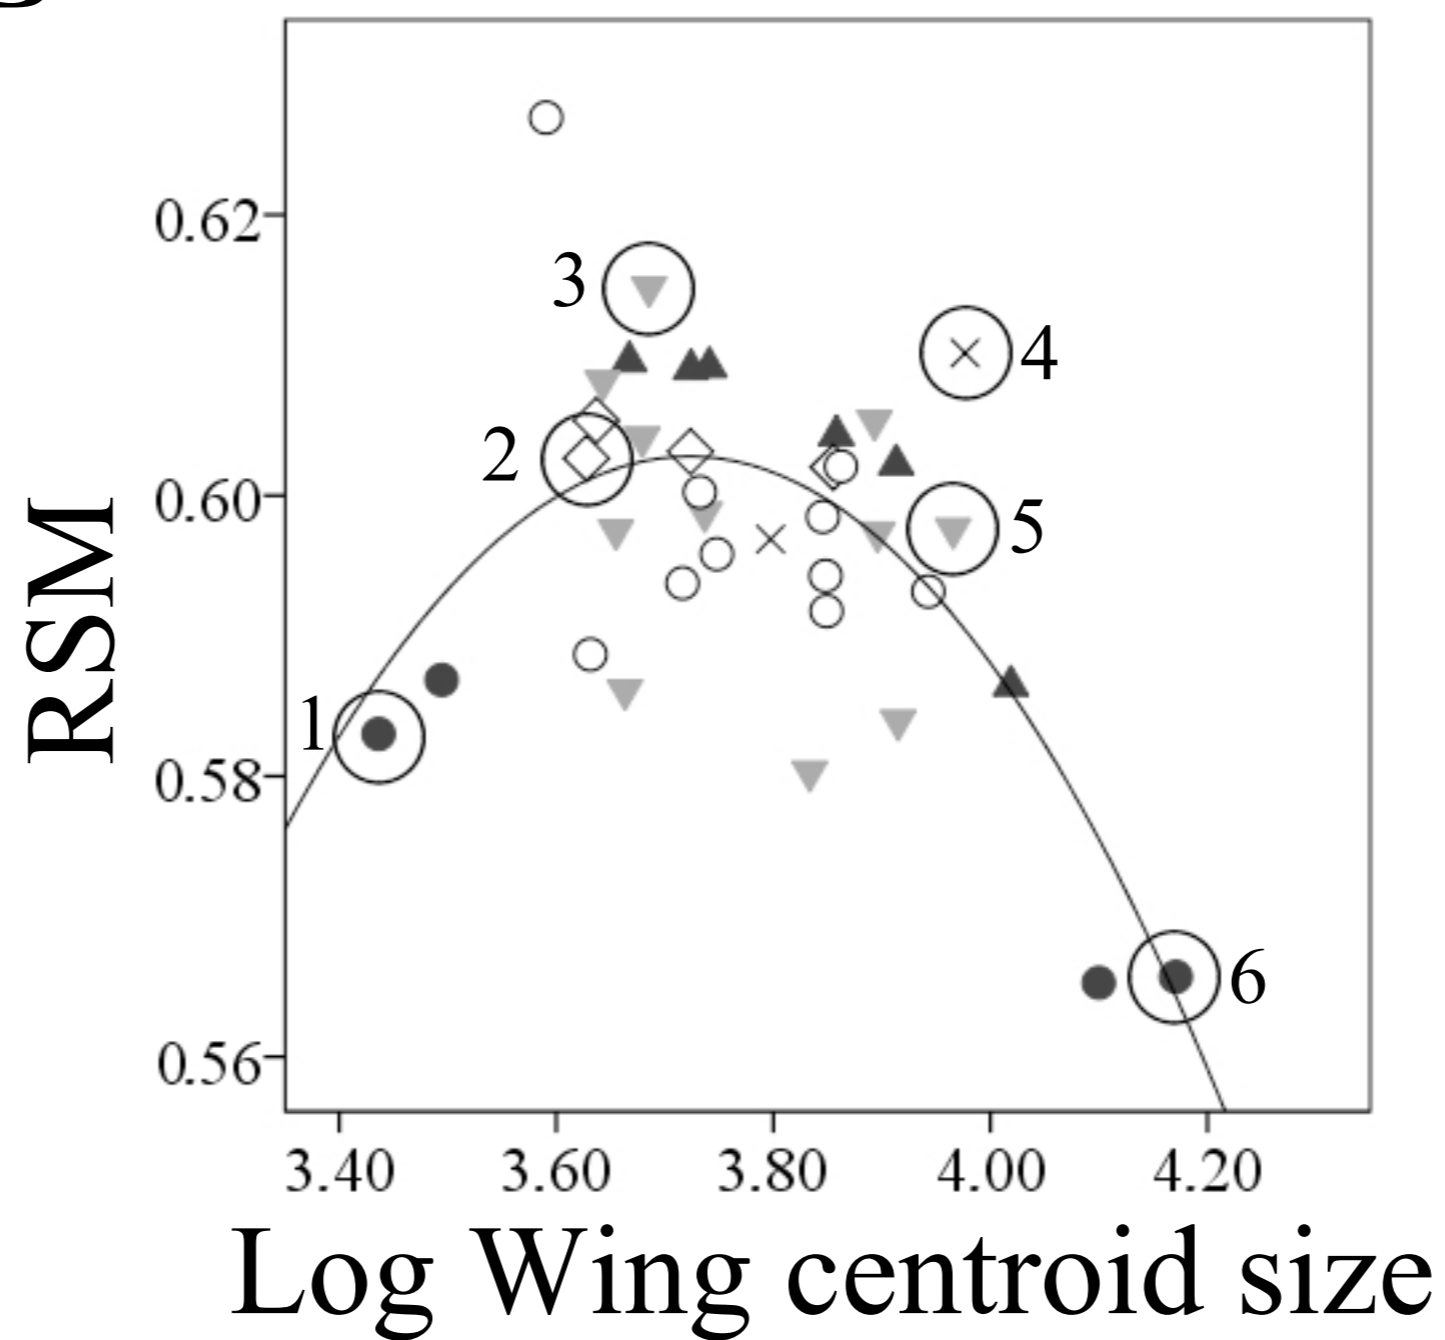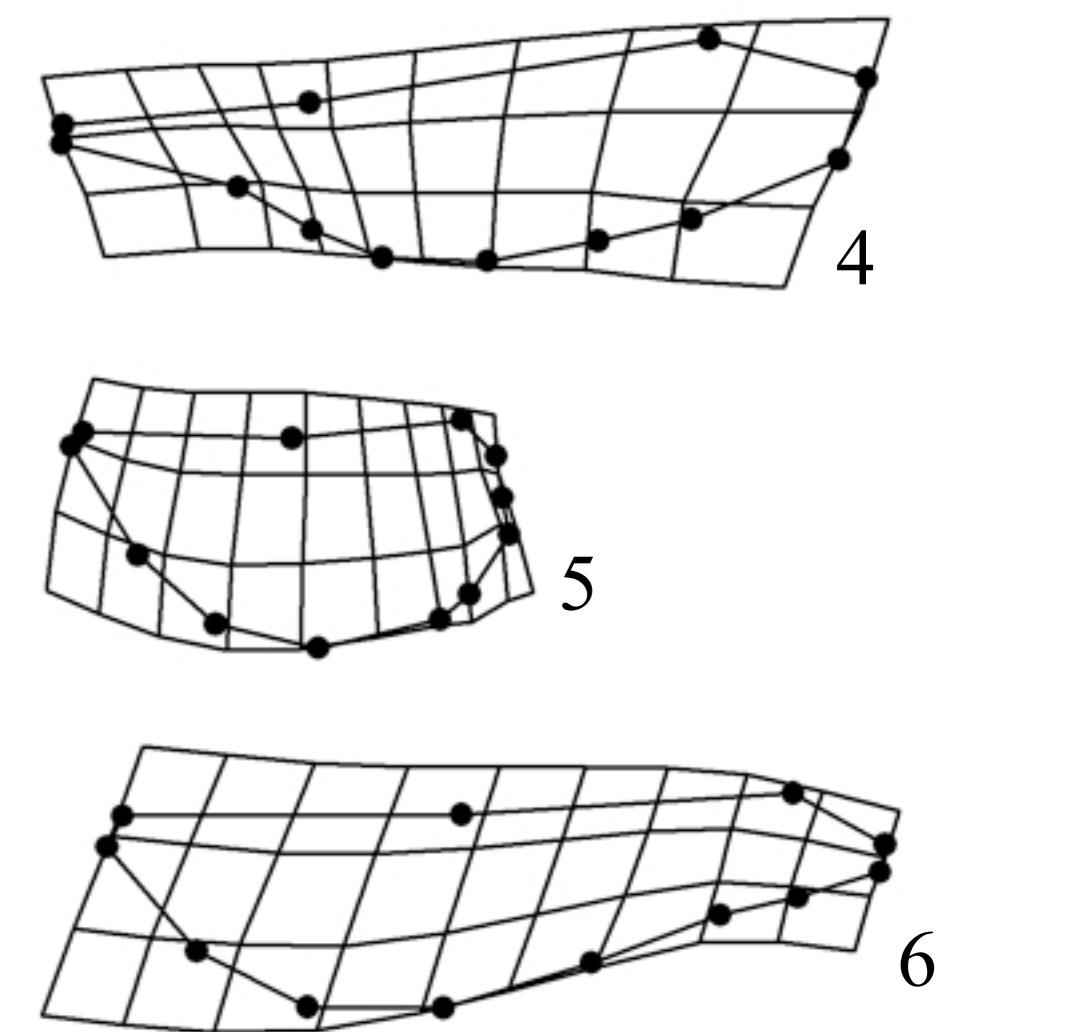

Supplement: 12862_2013_2370_MOESM1_ESM.pdf [file 12862_2013_2370_MOESM1_ESM.pdf]

**A**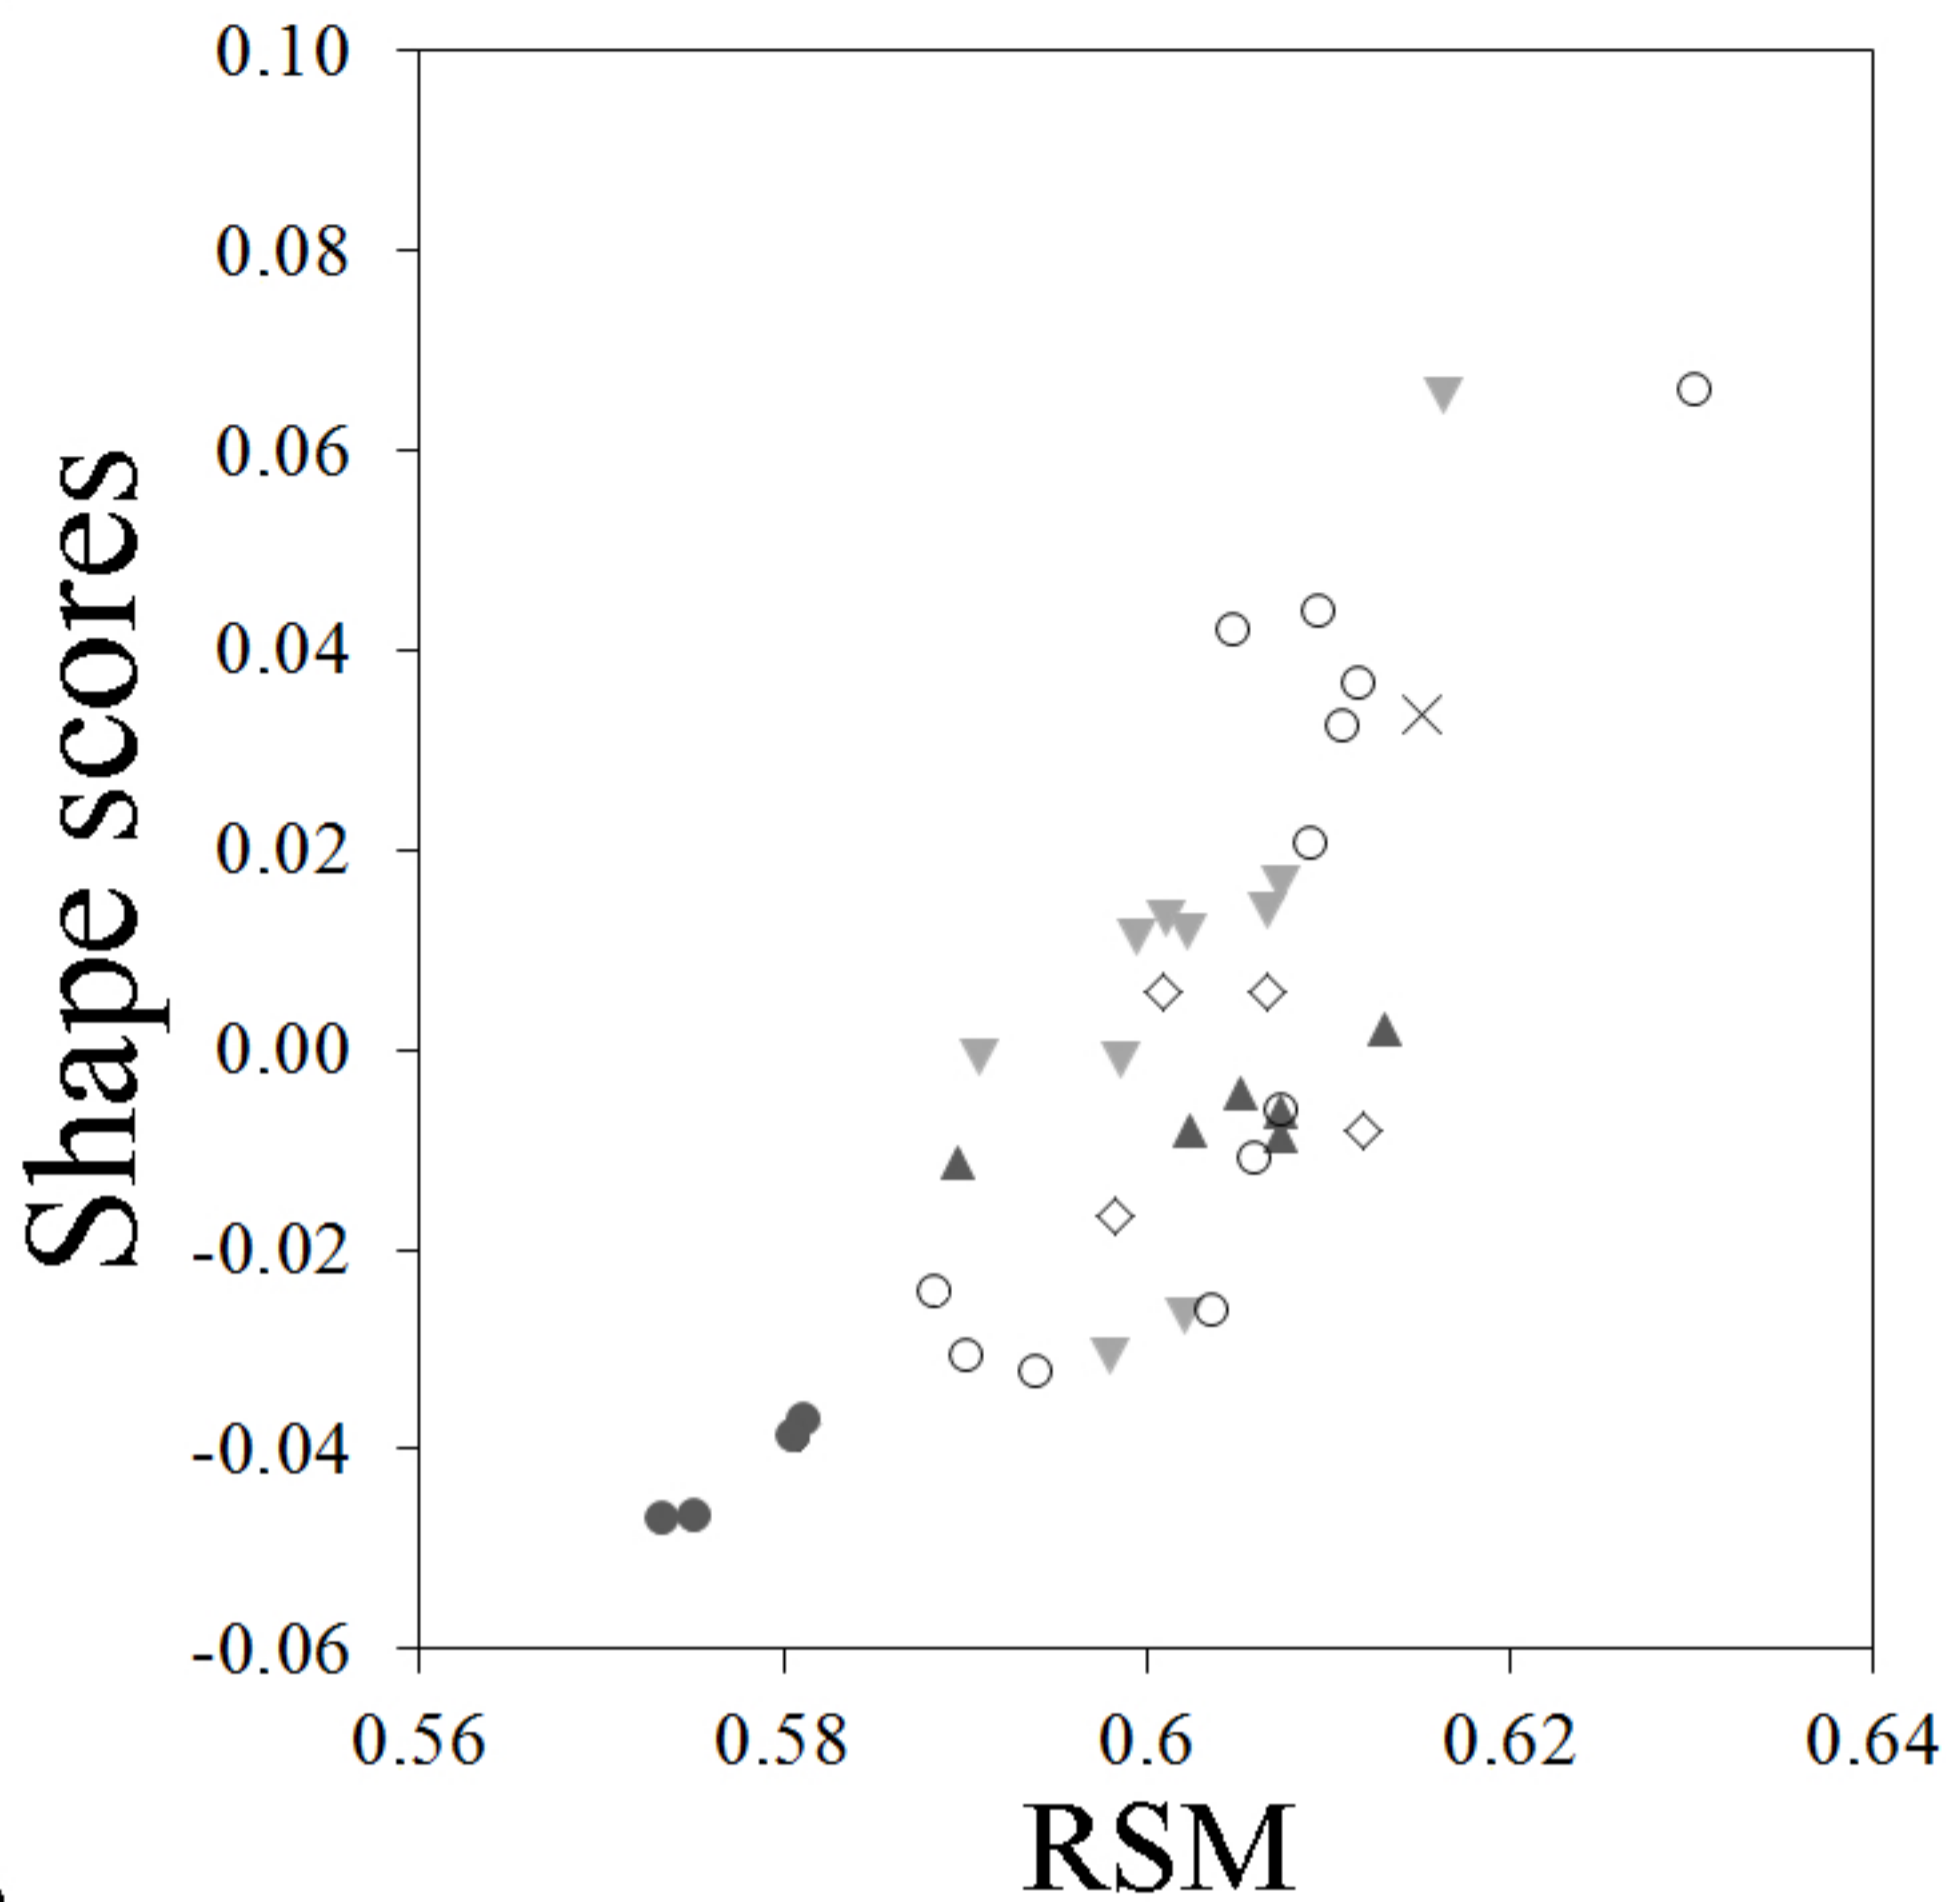**B**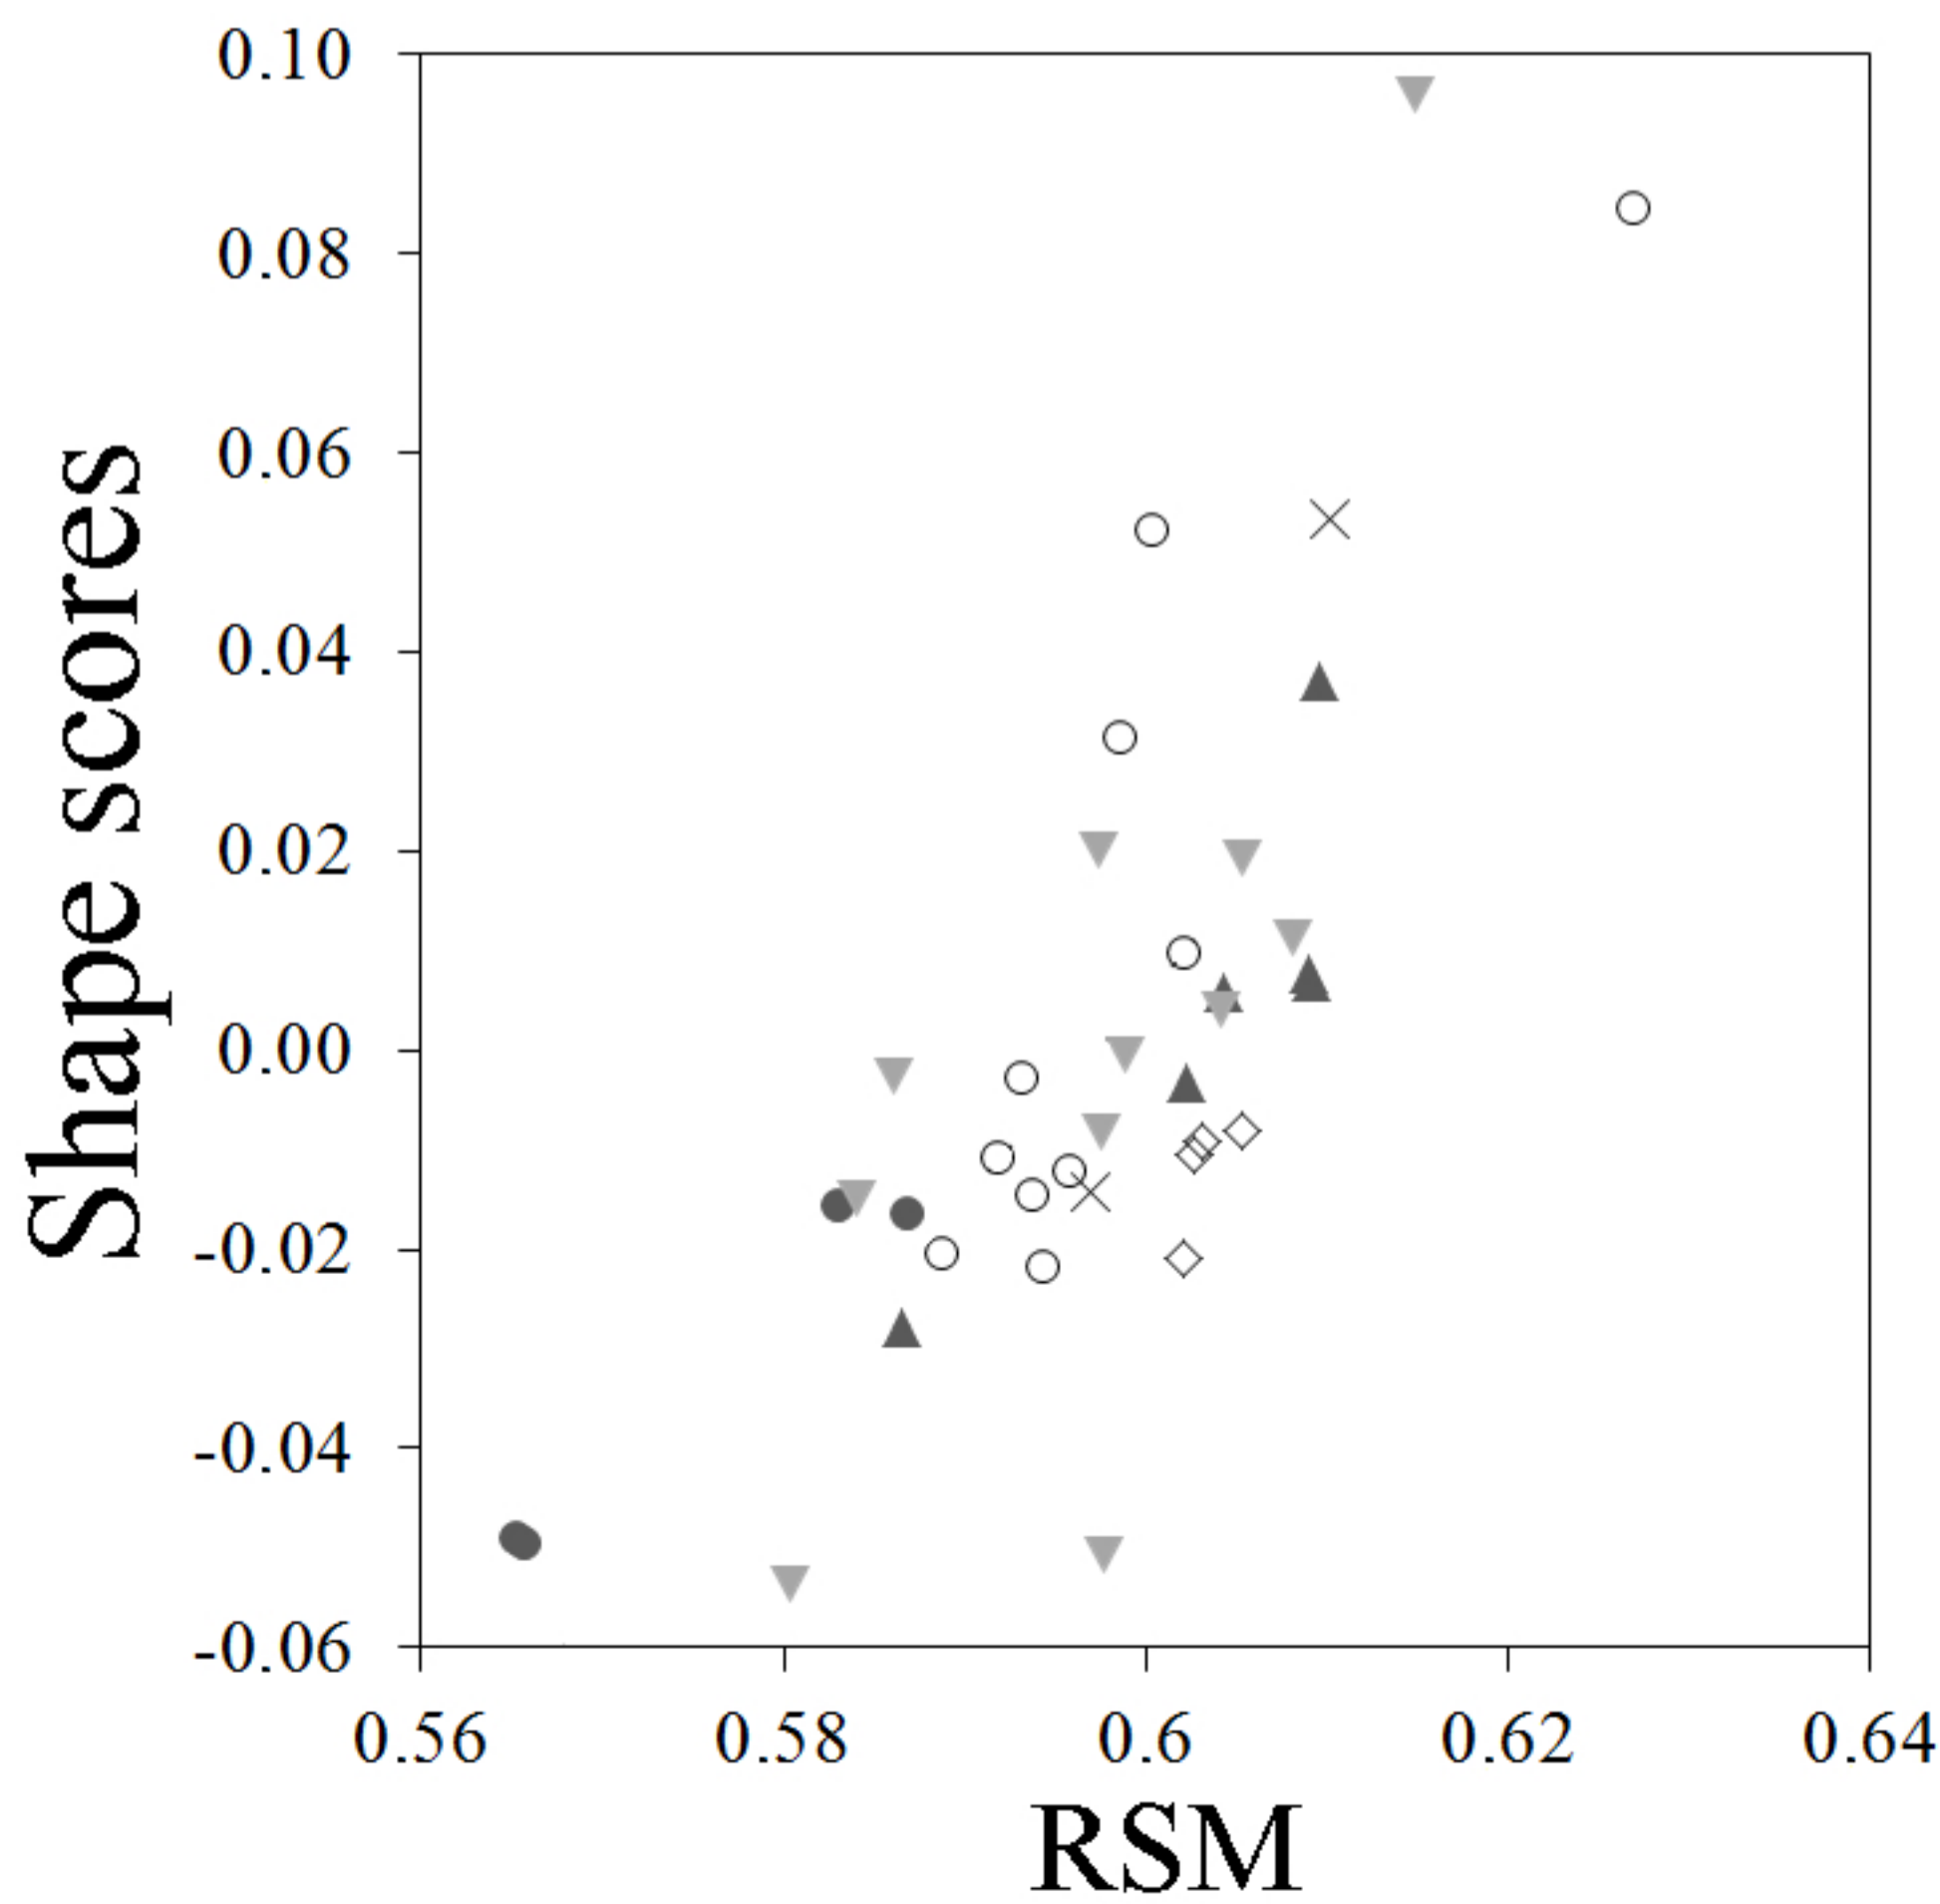

Supplement: 12862_2013_2370_MOESM2_ESM.pdf [file 12862_2013_2370_MOESM2_ESM.pdf]

RSM

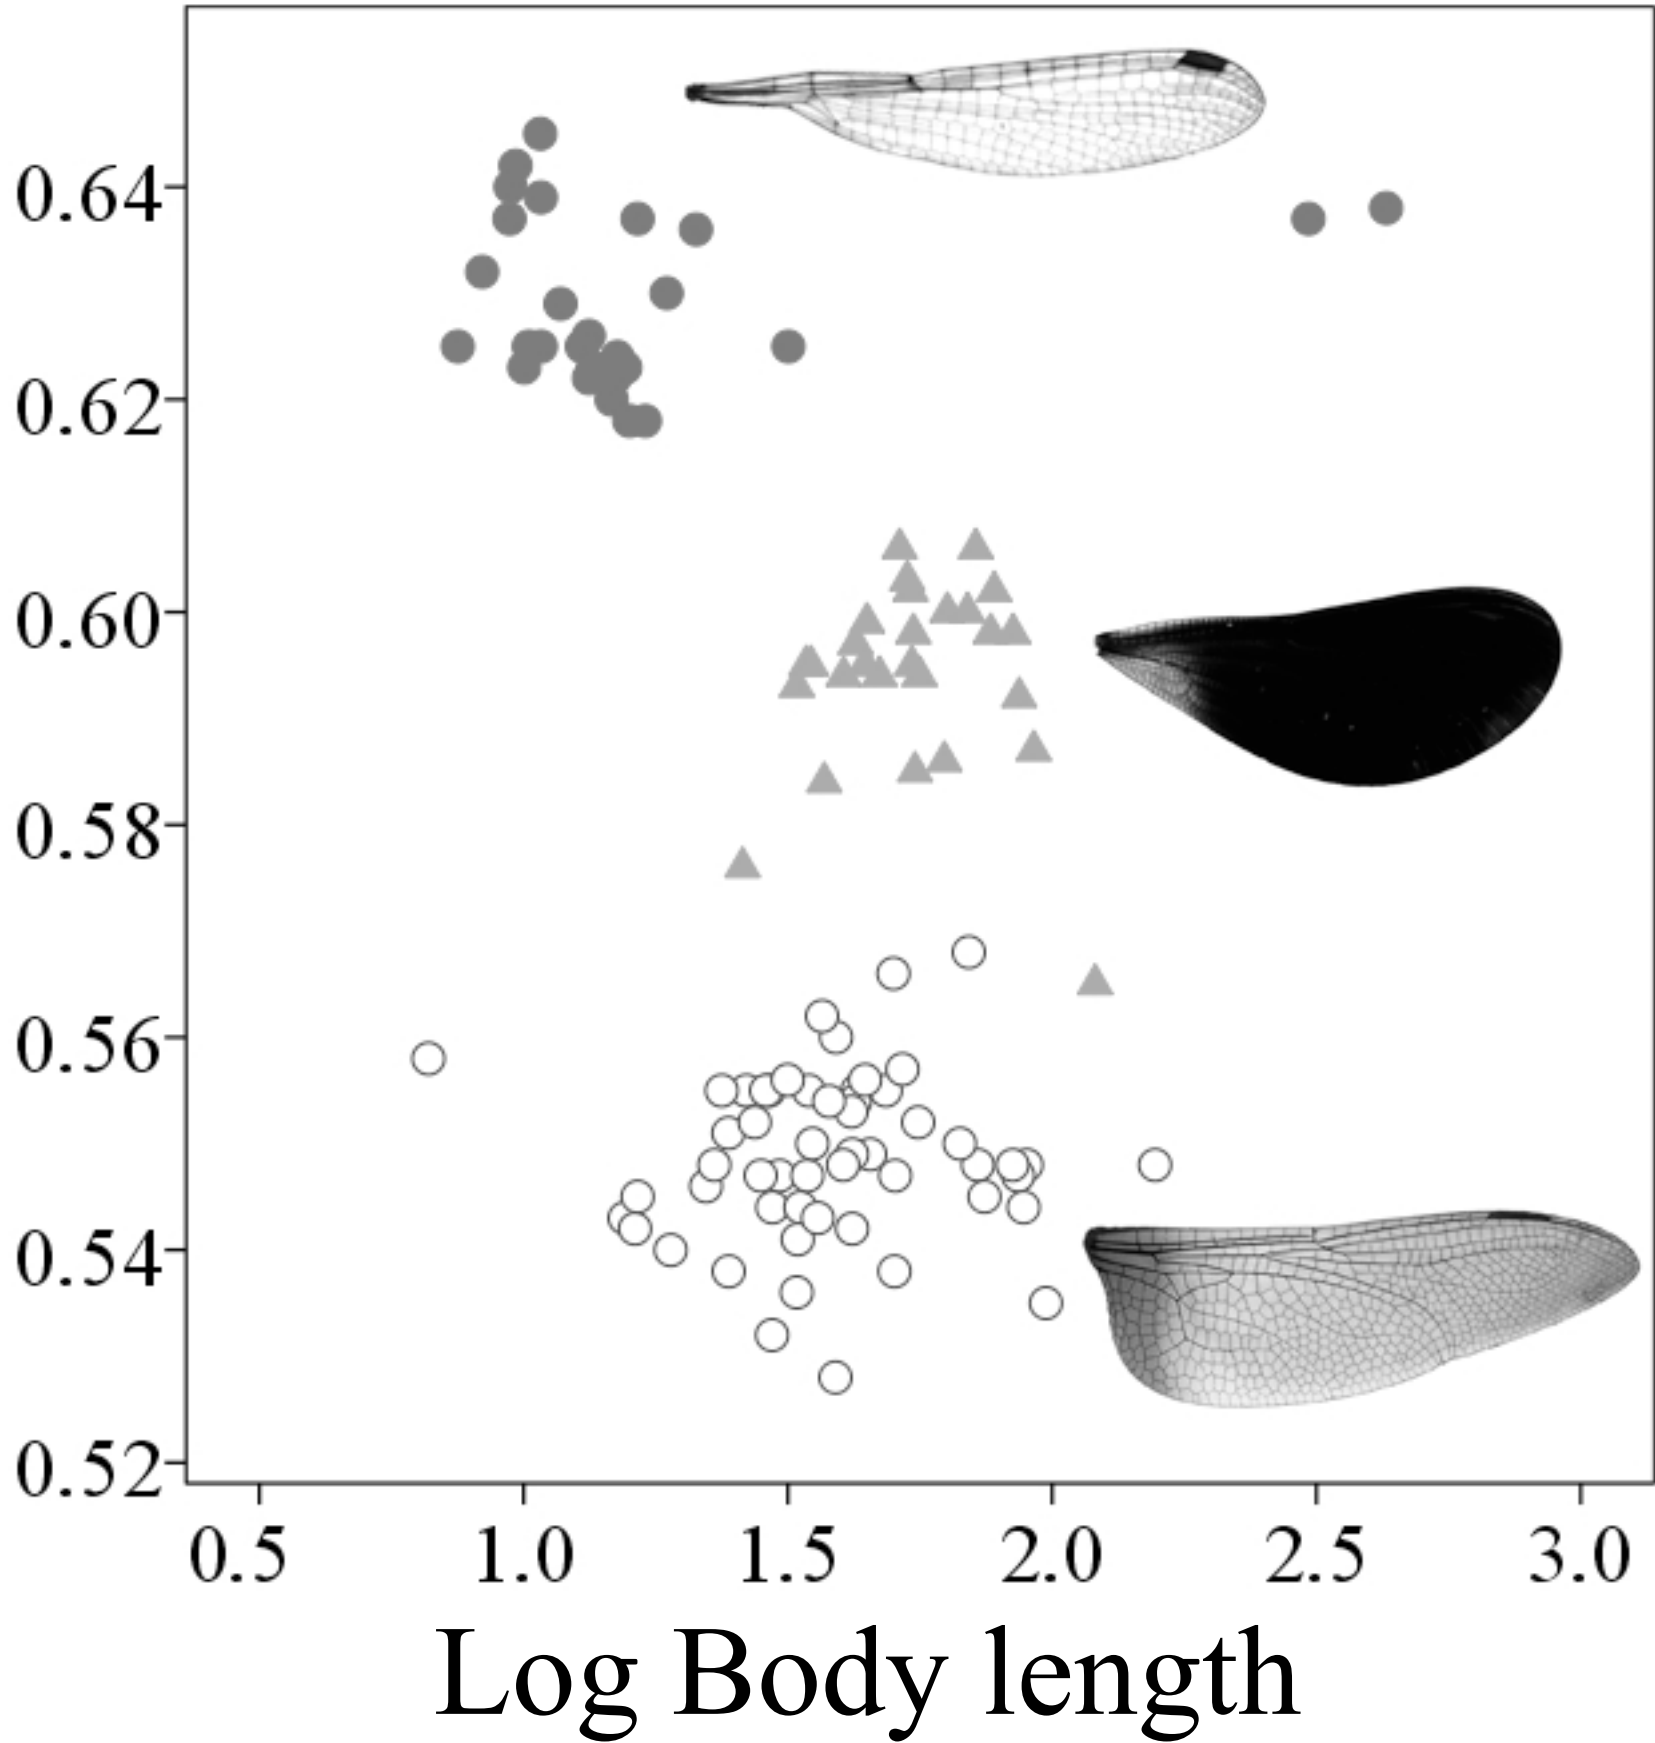

Supplement: 12862_2013_2370_MOESM3_ESM.pdf [file 12862_2013_2370_MOESM3_ESM.pdf]

**A**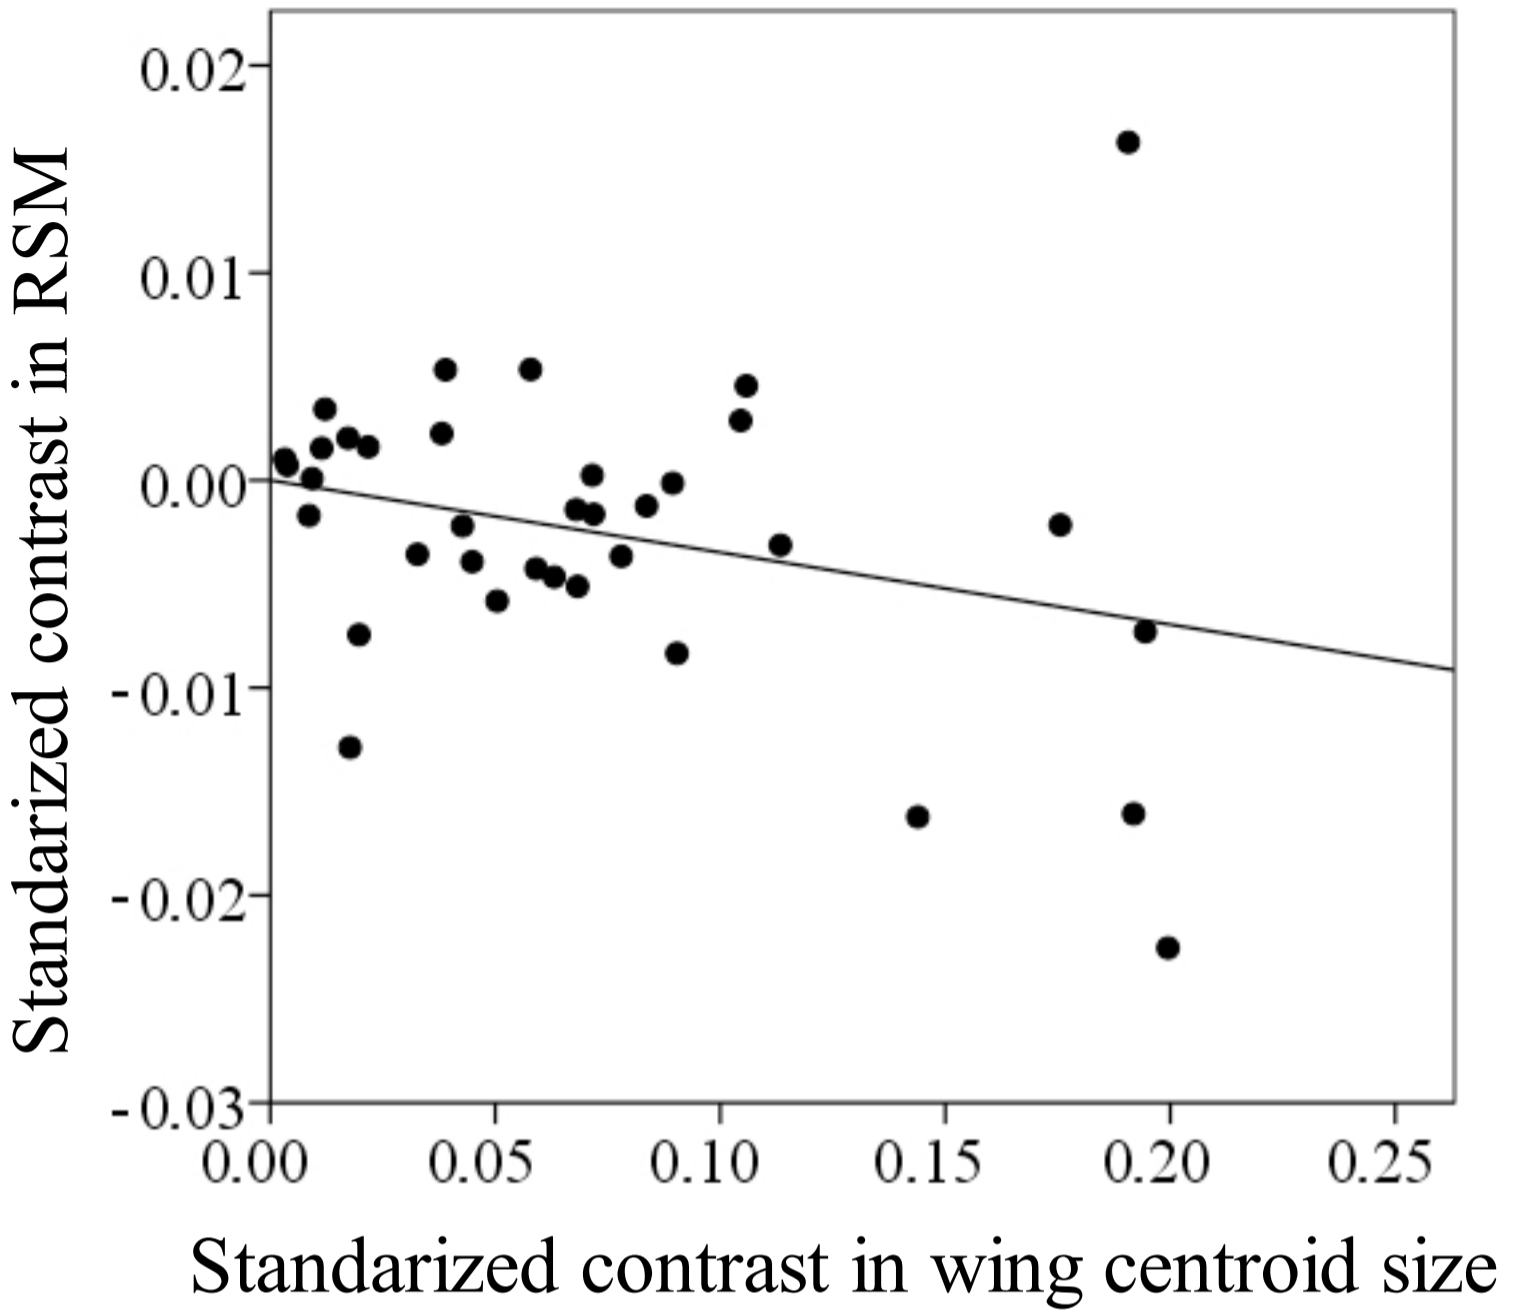

Supplement: 12862_2013_2370_MOESM4_ESM.pdf [file 12862_2013_2370_MOESM4_ESM.pdf]

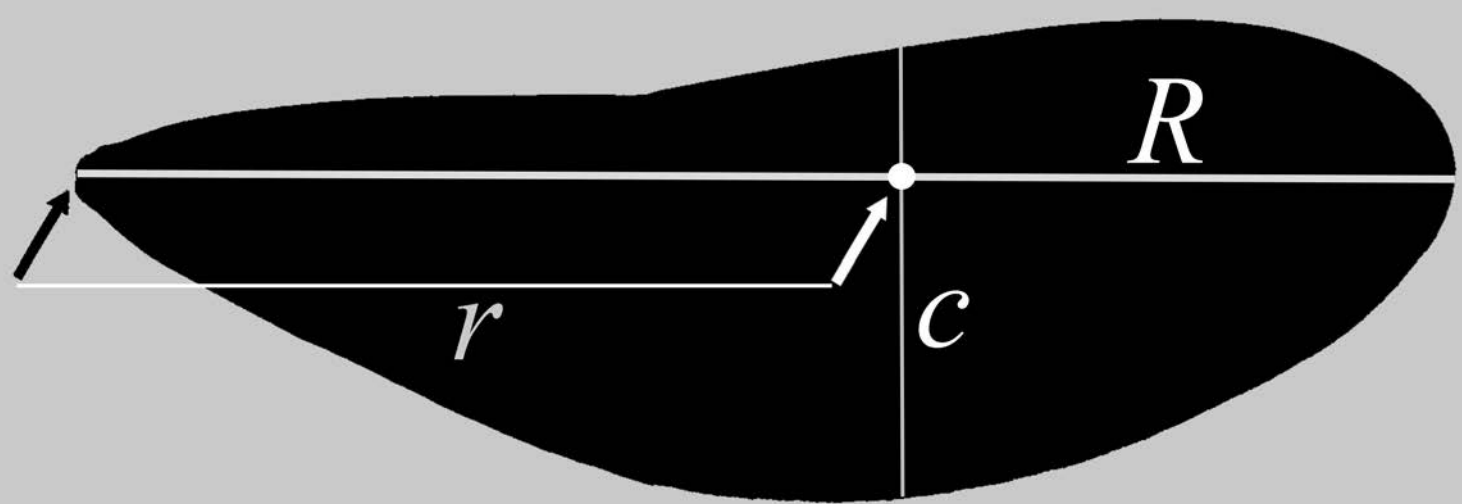

Supplement: 12862_2013_2370_MOESM5_ESM.pdf [file 12862_2013_2370_MOESM5_ESM.pdf]

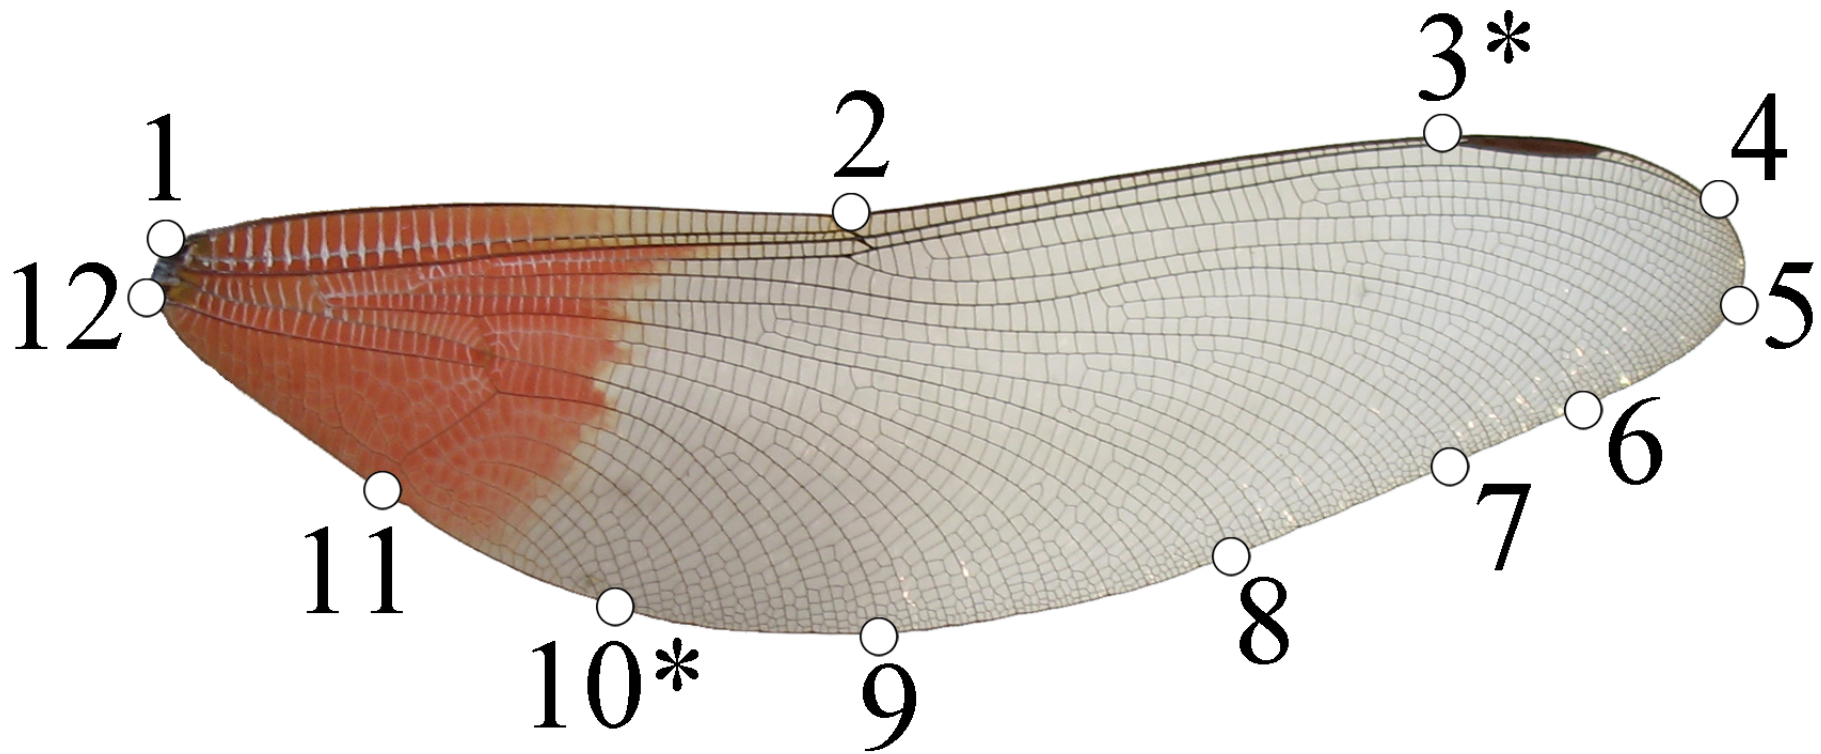

Supplement: 12862_2013_2370_MOESM6_ESM.pdf [file 12862_2013_2370_MOESM6_ESM.pdf]

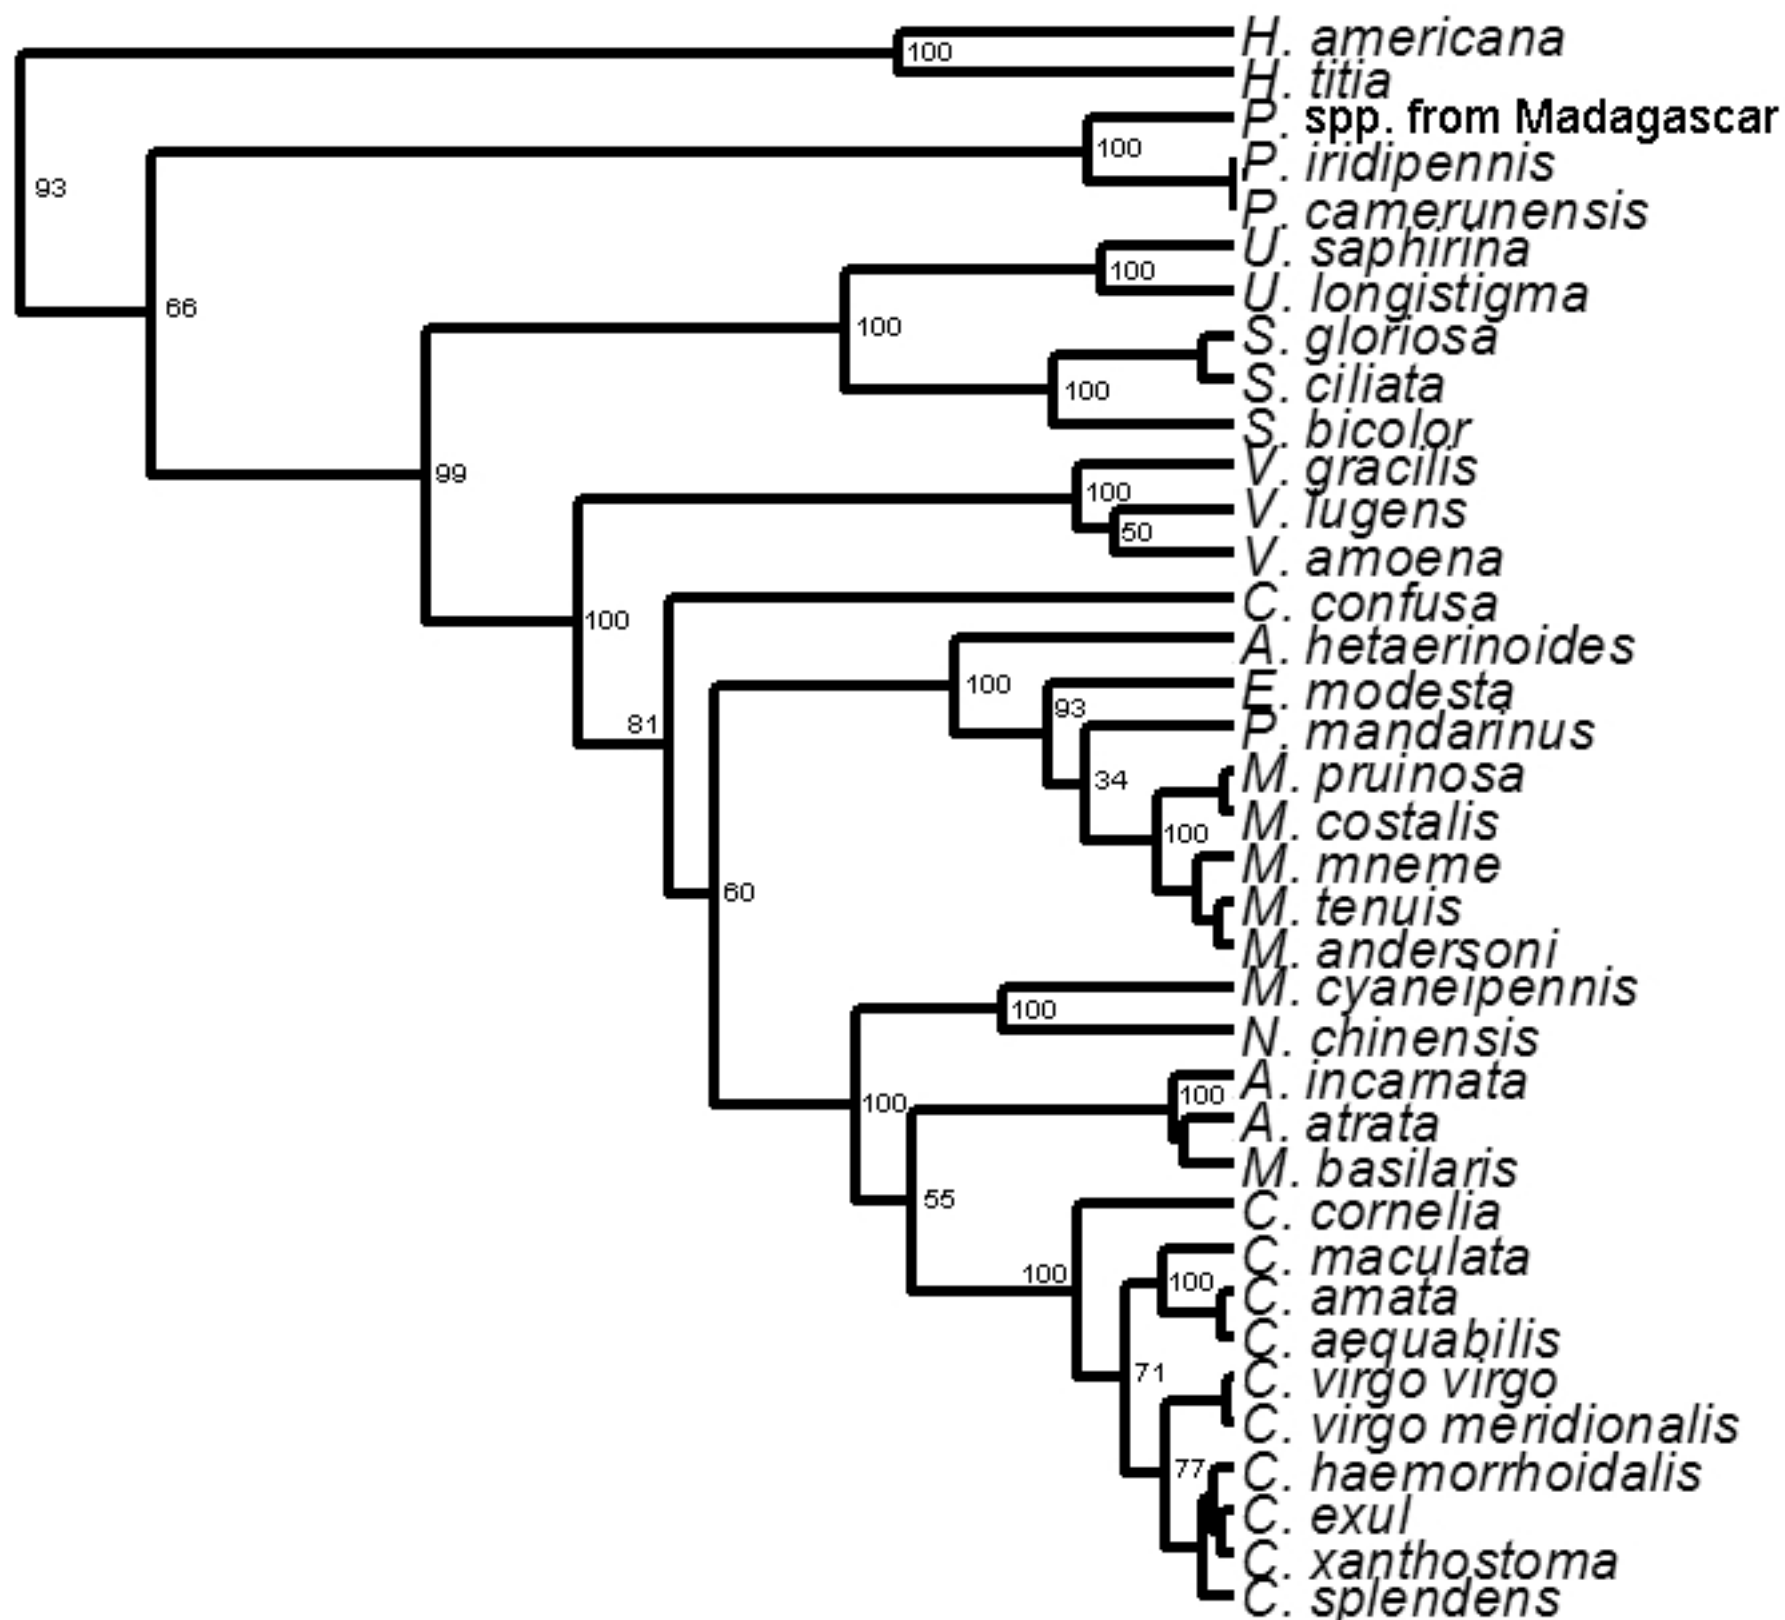

0.2 0.15 0.1 0.05 0 substitutions/site

Supplement: 12862_2013_2370_MOESM7_ESM.pdf [file 12862_2013_2370_MOESM7_ESM.pdf]
